# Supplementary material
Source: PubMed Central journal article supplement (PMC4070035)
Supplement: 97320630010267S1.pdf [file 97320630010267S1.pdf]

## Supplementary material:

**Table 1:** Growth pattern of 52 *E.coli* isolates at sub MIC concentration of heavy metals.

| Isolates | Metals           |                |                  |                |                  |                |
|----------|------------------|----------------|------------------|----------------|------------------|----------------|
|          | Cr <sup>6+</sup> |                | Cd <sup>2+</sup> |                | Ni <sup>3+</sup> |                |
|          | Sub MIC (µg/ml)  | Growth Pattern | Sub MIC (µg/ml)  | Growth Pattern | Sub MIC (µg/ml)  | Growth Pattern |
| EC1      | 1200             | +              | 50               | +              | 1600             | +              |
| EC2      | 1200             | +              | 100              | +              | 1600             | +              |
| EC3      | 1200             | +              | 100              | +              | 1600             | +              |
| EC4      | 800              | +              | 50               | +              | 1600             | ++             |
| EC5      | 400              | ++             | 50               | +              | 1600             | ++             |
| EC6      | 50               | +              | 50               | +              | 1600             | ++             |
| EC7      | 50               | +              | 100              | +              | 1600             | +              |
| EC8      | 50               | +              | 50               | +              | 1600             | +              |
| EC9      | 400              | ++             | 50               | +              | 1600             | +              |
| EC10     | 400              | +              | 400              | +              | 1600             | +              |
| EC11     | 800              | +              | 50               | +              | 1600             | +              |
| EC12     | 400              | +              | 50               | +              | 1600             | +              |
| EC13     | 1200             | +              | 800              | +              | 800              | ++             |
| EC14     | 50               | +              | 800              | +              | 800              | +              |
| EC15     | 1200             | +              | 50               | +              | 800              | +              |
| EC16     | 1200             | +              | 400              | +              | 800              | +              |
| EC17     | 50               | +              | 400              | +              | 800              | +              |
| EC18     | 50               | +              | 400              | +              | 200              | ++             |
| EC19     | 50               | +              | 800              | +              | 800              | ++             |
| EC20     | 400              | +              | 50               | +              | 400              | ++             |
| EC21     | 1200             | +              | 50               | +              | 800              | +              |
| EC22     | 400              | +              | 400              | +              | 400              | +              |
| EC23     | 800              | ++             | 200              | +              | 800              | +              |
| EC24     | 1200             | +              | 800              | +              | 800              | ++             |
| EC25     | 400              | +              | 800              | +              | 400              | ++             |
| EC26     | 200              | +              | 100              | ++             | 800              | ++             |
| EC27     | 1200             | +              | 400              | +              | 800              | +              |
| EC28     | 800              | ++             | 200              | +              | 800              | ++             |
| EC29     | 800              | +              | 200              | ++             | 800              | +              |
| EC30     | 800              | +              | 200              | +              | 200              | +              |
| EC31     | 800              | +              | 100              | ++             | 800              | ++             |
| EC32     | 800              | +              | 100              | ++             | 400              | ++             |
| EC33     | 400              | +++            | 400              | +              | 400              | +              |
| EC34     | 200              | +              | 100              | +              | 400              | +              |
| EC35     | 200              | +              | 100              | +              | 200              | ++             |
| EC36     | 400              | +++            | 400              | +              | 400              | +              |
| EC37     | 200              | +++            | 400              | +              | 200              | +++            |
| EC38     | 200              | +              | 400              | +              | 200              | +++            |
| EC39     | 200              | ++             | 200              | +              | 200              | ++             |
| EC40     | 200              | ++             | 200              | +              | 100              | +++            |
| EC41     | 200              | ++             | 100              | +              | 200              | +              |
| EC42     | 200              | +              | 100              | +              | 200              | ++             |
| EC43     | 800              | +              | 100              | +              | 200              | ++             |
| EC44     | 400              | +              | 200              | +              | 400              | +              |
| EC45     | 400              | ++             | 200              | +              | 200              | +              |
| EC46     | 400              | +              | 100              | +              | 400              | ++             |
| EC47     | 400              | +              | 100              | +              | 100              | +++            |
| EC48     | 400              | ++             | 200              | +              | 100              | +++            |
| EC49     | 400              | +++            | 200              | +              | 400              | ++             |
| EC50     | 800              | ++             | 100              | +              | 100              | +++            |
| EC51     | 400              | +              | 200              | +              | 100              | +++            |
| EC52     | 400              | +++            | 50               | +              | 100              | +++            |

EC=*E. coli*, +=less growth, ++=Moderate growth, +++= High growth and - = growth not detected

**Table 2:** Percentage of resistance against antibiotics/ drugs in 52 *E. coli* isolates from the hospital wastewater.

| Antibiotics     | Concentration (ug/disc) | No of Resistant isolates | Percentage % |
|-----------------|-------------------------|--------------------------|--------------|
| Cephradin       | 25                      | 30                       | 57.69        |
| Chloramphenicol | 30                      | 2                        | 3.84         |
| Erythromycin    | 15                      | 14                       | 26.92        |
| Gentamycine     | 30                      | 1                        | 1.92         |
| Methicillin     | 30                      | 45                       | 86.53        |
| Nalidixic acid  | 30                      | 13                       | 25           |
| Neomycin        | 30                      | 0                        | 0            |
| Penicillin      | 10                      | 38                       | 73.07        |
| Rifampicin      | 2                       | 18                       | 34.61        |
| Streptomycin    | 25                      | 0                        | 0            |

**Table 3:** Antibiotic resistance pattern in 52 *E. coli* isolates from the hospital wastewater.

| No. of antibiotics | Resistance pattern   | No of resistant isolates | Percentage (%) | MAR  |
|--------------------|----------------------|--------------------------|----------------|------|
| 1                  | M                    | 12                       | 25             |      |
|                    | P                    | 1                        |                |      |
| 2                  | M, E                 | 1                        | 5.76           | 0.02 |
|                    | M, P                 | 1                        |                |      |
|                    | P, CH                | 7                        |                |      |
| 3                  | M, P, CH             | 7                        | 13             | 0.04 |
|                    |                      |                          | 25             | 0.03 |
| 4                  | M, P, CH, Rif,       | 6                        |                |      |
|                    | M, P, NA, CH         | 2                        |                |      |
|                    | M, P, CH, E,         | 3                        |                |      |
|                    | M, P, E, Rif         | 1                        |                |      |
| 5                  | M, P, NA, CH, Rif    | 3                        | 13.46          | 0.07 |
|                    | M, P, NA, E, Rif     | 1                        |                |      |
|                    | M, P, NA, CH, E      | 3                        |                |      |
| 6                  | M, P, C, NA, CH, Rif | 1                        | 7.69           | 0.15 |
|                    | M, P, NA, CH, E, Rif | 1                        |                |      |
|                    | M, P, Gen, NA, CH, E | 1                        |                |      |
|                    | M, P, C, NA, CH, E,  | 1                        |                |      |

M = Methicillin; P = Penicillin; C = Chloramphenicol; NA = Nalidixic Acid; CH = Cephradin  
E = Erythromycin; Rif = Rifampicin
